# Supplementary material for: Impact of Illegible Prescriptions on Dispensing Practice: A Pilot Study of South African Pharmacy Personnel
Source: MDPI journal article supplement (doi:10.3390/pharmacy10050132), 2022-10-12
Supplement: s1 [file s1]

## **S1: Online Survey**

THE AIM OF THIS STUDY IS TO EVALUATE PHARMACY PERSONNEL'S READABILITY OF SLOPPY PRESCRIPTIONS AND WHAT THEIR CONCERNS OR CHALLENGES ARE IN DISPENSING SLOPPY PRESCRIPTIONS.

### **Demographic Questions:**

#### **Age:**

- ☐ 18-25
- ☐ 26-30
- ☐ 31-39
- ☐ >40

#### **Gender:**

- ☐ Male
- ☐ Female
- ☐ Other

#### **Pharmacy Personnel:**

- ☐ Pharmacist
- ☐ Pharmacist Intern
- ☐ Pharmacist assistant (qualified-post basic)
- ☐ Community service Pharmacist
- ☐ Pharmacy Student 3<sup>rd</sup> year
- ☐ Pharmacy student 4<sup>th</sup> year

#### **Highest Qualification:**

#### **Pharmacy sector:**

- ☐ Retail/community
- ☐ Locum (retail/community)
- ☐ Hospital/institutional
- ☐ Industry
- ☐ Academia
- ☐ Other, Specify:

#### **Years of experience:**

- ☐ <1 year
- ☐ 1-5 years

- 6-10 years
- 11-15 years
- 16-20 years
- >20 years

**Part 1: Survey assessing readability.**

|                                                                                                                                        |              |                 |                                      |
|----------------------------------------------------------------------------------------------------------------------------------------|--------------|-----------------|--------------------------------------|
| 1. Have you ever faced difficulty reading a sloppy/illegible prescription?                                                             | ○ Yes        | ○ No            |                                      |
| 2. Do you ask a colleague for assistance when you have difficulty reading a sloppy prescription?                                       | ○ Yes        | ○ No            | ○ Not Applicable                     |
| 3. Do you consult a WhatsApp/telegram/other social media groups for assistance when you have difficulty reading a sloppy prescription? | ○ Yes        | ○ No            | ○ Not Applicable                     |
| 4. Do you contact the prescriber to confirm the medication/dosage if ambiguity exists?                                                 | ○ Yes        | ○ No            | ○ Not Applicable                     |
| 5. Are you hesitant to call the prescriber when you have difficulty reading a prescription?                                            | ○ Yes        | ○ No            | ○ Not Applicable                     |
| 6. Do you prefer handwritten prescriptions or digital prescriptions?                                                                   | Hand written | Printed Digital | e-prescription (sent via e.g. gmail) |

|                                                                                                                                                                                                                                                                                                |                           |                          |                                  |
|------------------------------------------------------------------------------------------------------------------------------------------------------------------------------------------------------------------------------------------------------------------------------------------------|---------------------------|--------------------------|----------------------------------|
| 7. Do you face difficulty in reading the letters or numbers when dispensing a sloppy prescription?                                                                                                                                                                                             | Letters                   | Numbers                  | Both                             |
| 8. Have you ever made an error in interpreting or dispensing of a prescription due to bad handwriting?                                                                                                                                                                                         | <input type="radio"/> Yes | <input type="radio"/> No | <input type="radio"/> Don't Know |
| <p>Please answer the questions to follow in reference to the following attached prescription below</p> <p><b>*Attached Sloppy Prescription Images*</b></p> <p>(Note: This will be done for the following 5 different sloppy prescriptions with the same questions asked for each of them.)</p> |                           |                          |                                  |

**Prescription 1:**

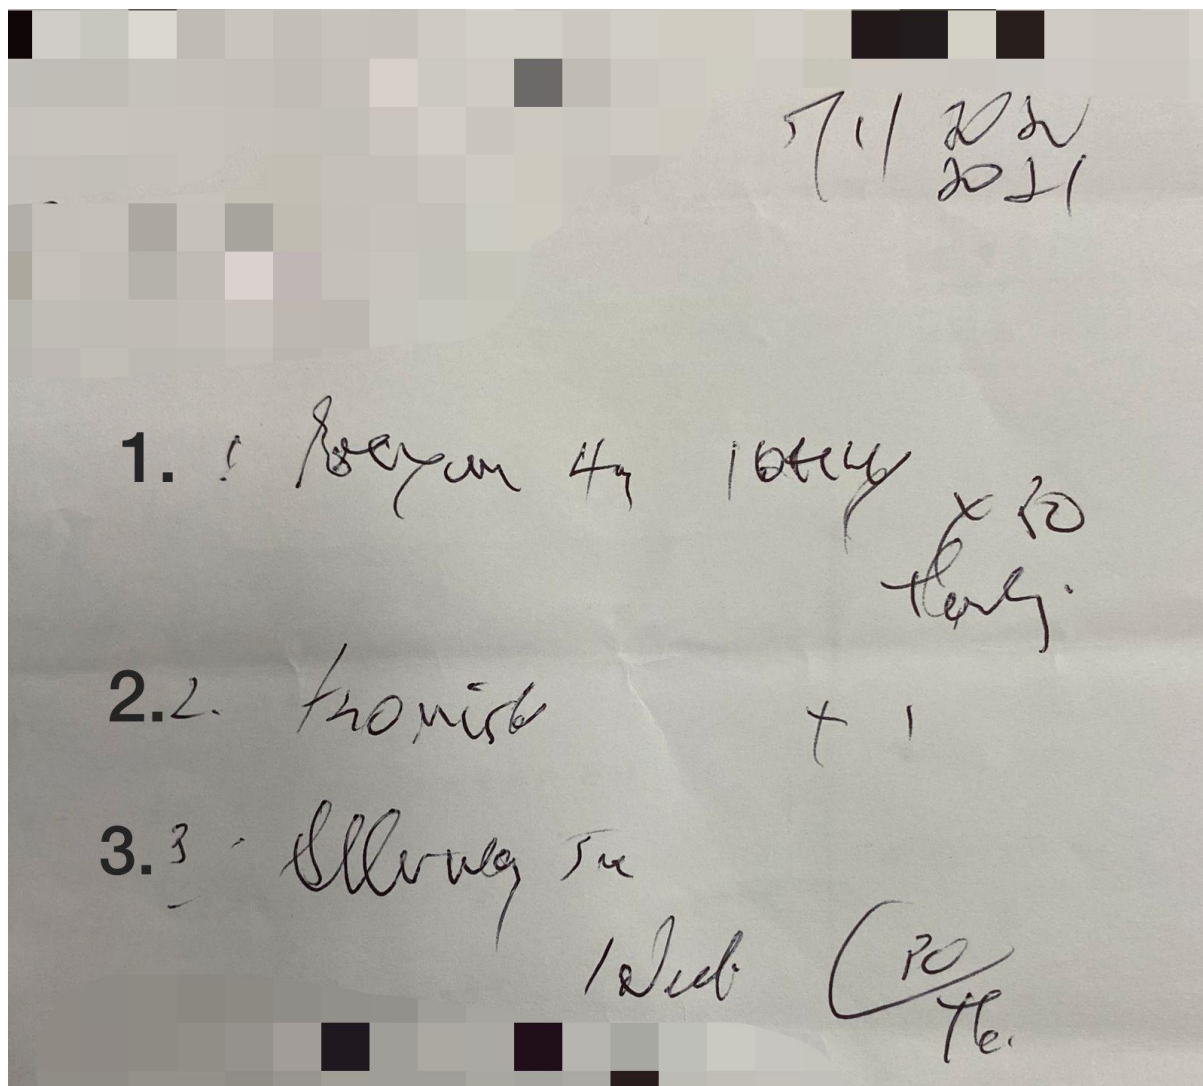

Prescription 2:

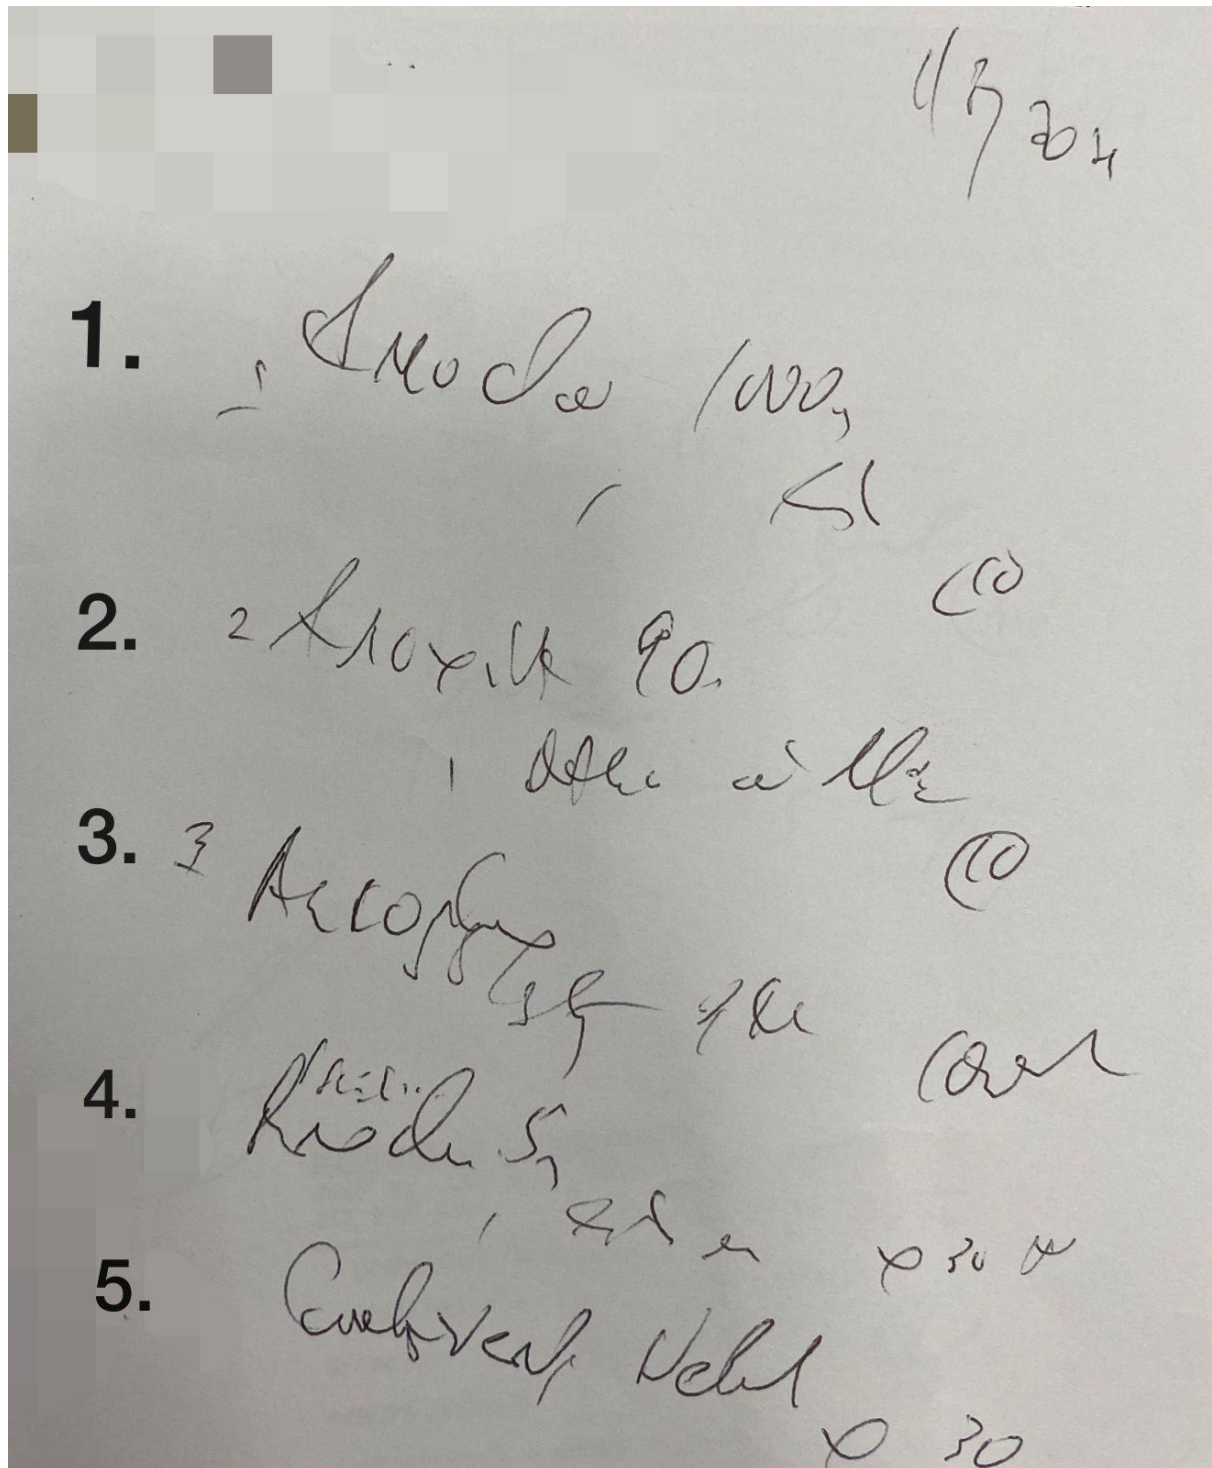

Prescription 3:

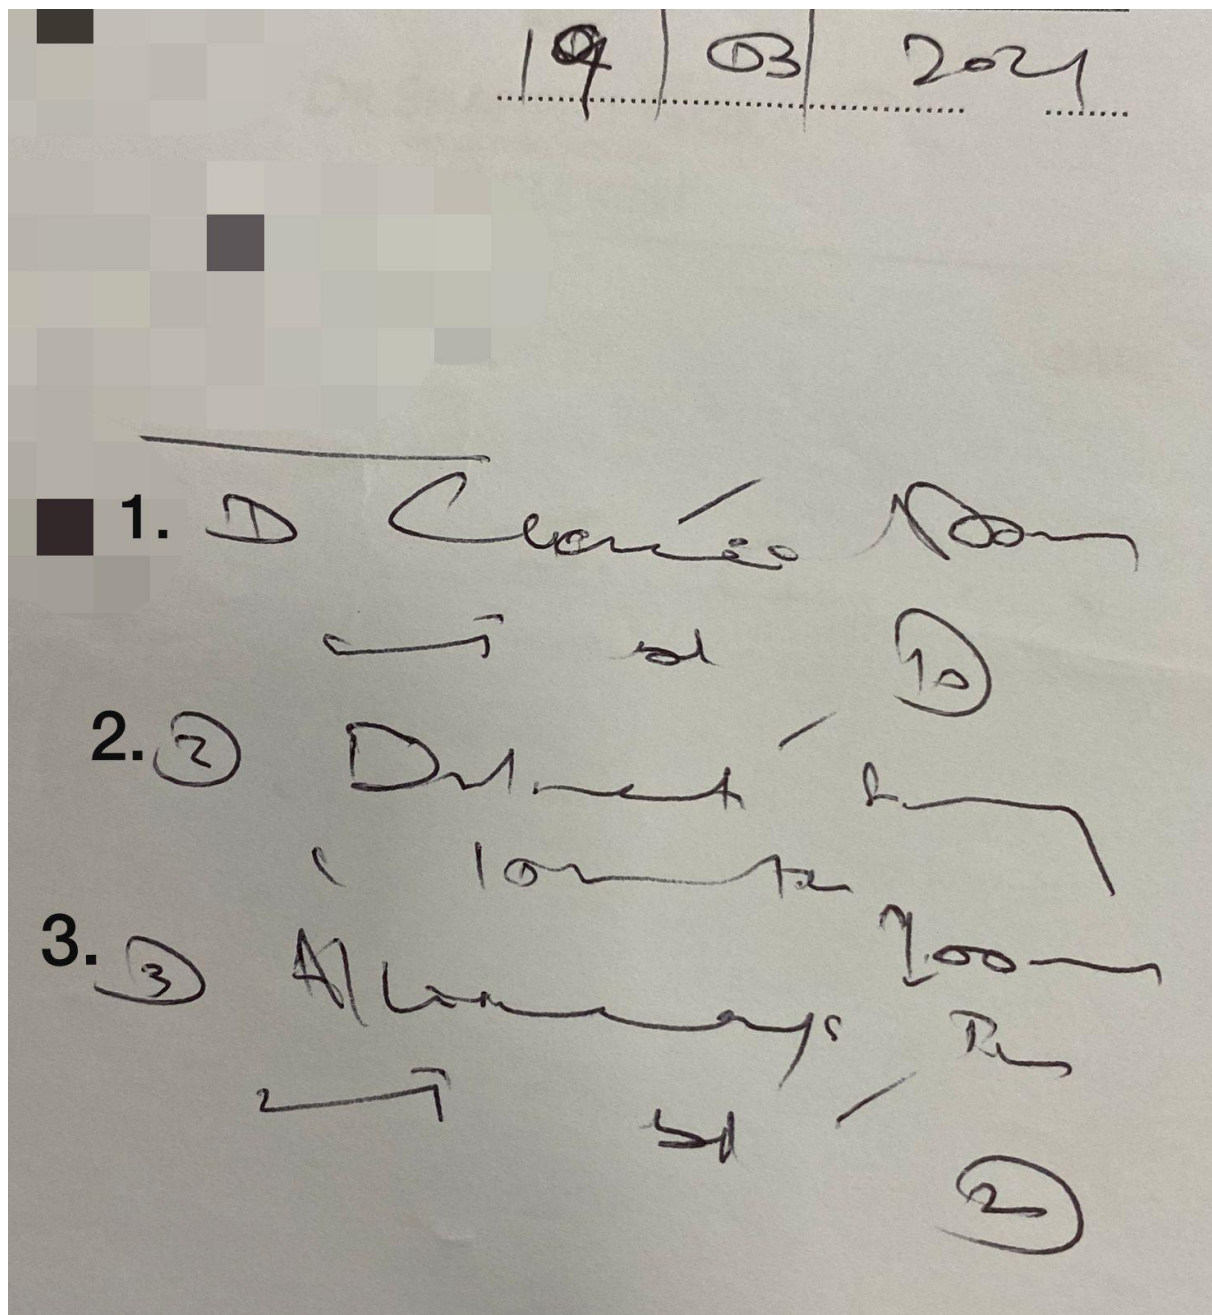



**Prescription 4:**

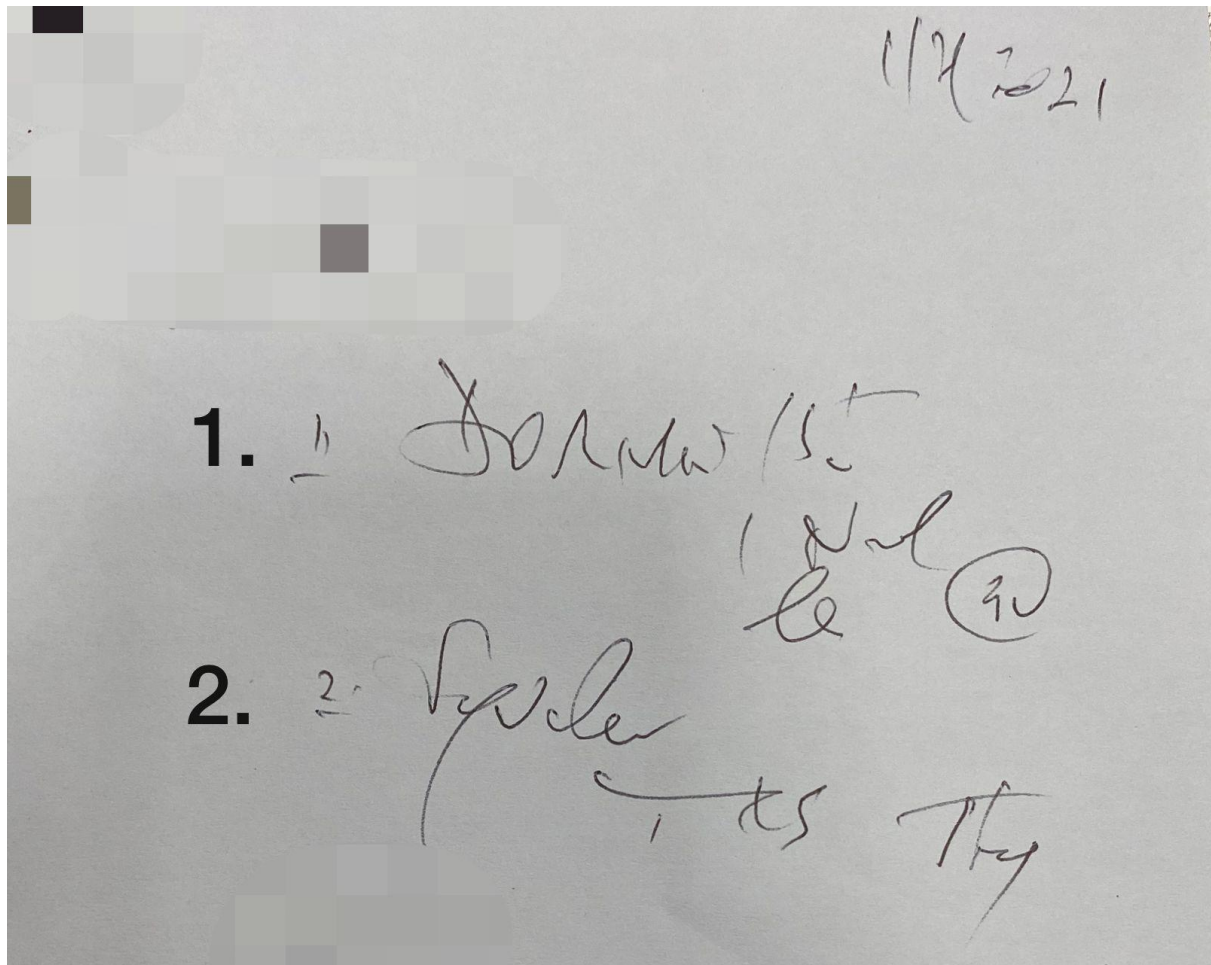

**Prescription 5:**

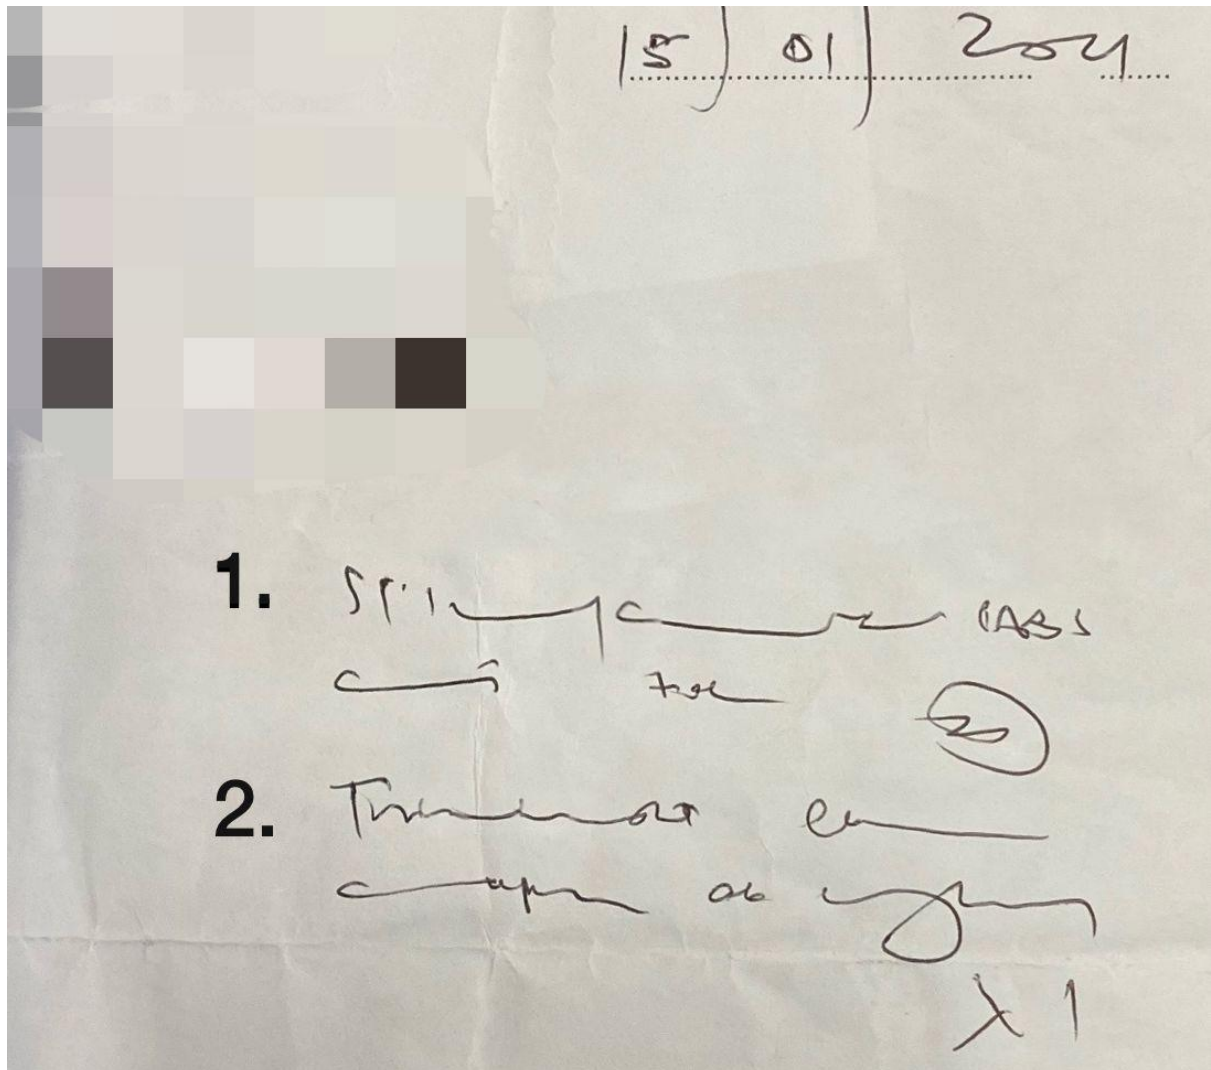



|                                                                                                                                                                                                                                                                                                                                                                               |                                                                                                                                     |                          |                                      |
|-------------------------------------------------------------------------------------------------------------------------------------------------------------------------------------------------------------------------------------------------------------------------------------------------------------------------------------------------------------------------------|-------------------------------------------------------------------------------------------------------------------------------------|--------------------------|--------------------------------------|
| <p>9. On a scale of 1-5 where:</p> <p>1=Bad (impossible to read and identify medication)</p> <p>2=Poor (illegible, words unclear and ambiguity exists)</p> <p>3= Fair (some words illegible, some words legible, meaning unclear)</p> <p>4=Good (most words legible)</p> <p>5=Excellent (all words are clear)</p> <p><b>How legible would you rate this prescription?</b></p> | <input type="radio"/> 1<br><input type="radio"/> 2<br><input type="radio"/> 3<br><input type="radio"/> 4<br><input type="radio"/> 5 |                          |                                      |
| <p>10. Please type out the medication you think was prescribed.</p> <p>medication 1:</p> <p>medication 2:</p> <p>medication 3:</p> <p>medication 4:</p> <p>medication 5:</p>                                                                                                                                                                                                  | <b>TEXTBOX</b>                                                                                                                      |                          |                                      |
| <p>11. What was the date (e.g. day (calendar number), month and year) the prescription was written?</p>                                                                                                                                                                                                                                                                       | <b>TEXTBOX</b>                                                                                                                      |                          |                                      |
| <p>12. Can you easily read the abbreviations used?</p>                                                                                                                                                                                                                                                                                                                        | <input type="radio"/> Yes                                                                                                           | <input type="radio"/> No | <input type="radio"/> Not Applicable |
| <p>13. Type the abbreviation used:</p>                                                                                                                                                                                                                                                                                                                                        | <b>TEXTBOX</b>                                                                                                                      |                          |                                      |
| <p>14. Can you easily read what quantity was prescribed?</p>                                                                                                                                                                                                                                                                                                                  | <input type="radio"/> Yes                                                                                                           | <input type="radio"/> No |                                      |

|                                                                                            |                                                                                                                                                                     |                          |
|--------------------------------------------------------------------------------------------|---------------------------------------------------------------------------------------------------------------------------------------------------------------------|--------------------------|
| 15. Please type out what quantity you think was prescribed                                 | <b>TEXTBOX</b>                                                                                                                                                      |                          |
| 16. Can you easily read the precise dosage?                                                | <input type="radio"/> Yes                                                                                                                                           | <input type="radio"/> No |
| 17. Please type the precise dosage you think was prescribed.                               | <b>TEXTBOX</b>                                                                                                                                                      |                          |
| 18. Can you easily read the dosage form?                                                   | <input type="radio"/> Yes                                                                                                                                           | <input type="radio"/> No |
| 19. Please type the dosage form below (oral, IV,IM etc.) below                             | <b>TEXTBOX</b>                                                                                                                                                      |                          |
| 20. If you could not read this prescription would you call the doctor?                     | <input type="radio"/> Yes                                                                                                                                           | <input type="radio"/> No |
| 21. In general how would you rate the current system in place for dispensing prescriptions | <input type="radio"/> Excellent<br><input type="radio"/> Good<br><input type="radio"/> Fair/Satisfactory<br><input type="radio"/> Poor<br><input type="radio"/> Bad |                          |

**Part 2: Survey with open-ended questions**

| Question                                                                                                              | Response (Type response in the textbox) |
|-----------------------------------------------------------------------------------------------------------------------|-----------------------------------------|
| 1. How often do you receive an illegible prescription?                                                                |                                         |
| 2. Can you give a few words on the process you follow to decipher a sloppy prescription?                              |                                         |
| 3. Do you find this process time-consuming?                                                                           |                                         |
| 4. Does receiving an illegible prescription affect service delivery in the pharmacy? If so, How?                      |                                         |
| 5. What are your biggest concerns/challenges around receiving a sloppy prescription?                                  |                                         |
| 6. Have you ever faced patient frustration as the delivery of service gets delayed when handed a sloppy prescription? |                                         |
| 7. Would you like to share any fears or past experiences you have faced in dispensing sloppy prescriptions?           |                                         |
| 8. What do you think are the consequences related to the dispensing of sloppy prescriptions?                          |                                         |
| 9. What are your thoughts on the current dispensing practices in place?                                               |                                         |
| 10. What are your suggestions with regards to improving the accuracy of reading prescriptions?                        |                                         |
| 11. Any other comments or thoughts you would like to share?                                                           |                                         |
